# Supplementary material for: Installation of HbG-Makassar by base editing restores hemoglobin function: a transformative therapy for sickle cell disease
Source: Research Square preprint supplement (doi:10.21203/rs.3.rs-3995314/v1), 2024-03-14
Supplement: Supplementary file 1 [file BFU-E NGS summary.xlsx]

## Sheet: 617 50
sample_name	target_site_seq		11G	1G_9G_11G	1G_9G_11G_14G	5T	5T_9G_11G	8T_9G_11G	9G	9G_11G	9G_11G_14G		10G_11G
S010-MC069_11_d17-27146	ACTTCTCCACAGGAGTCAGGTGC		0.4	0.01	0	0	0	0.01	0.1	99	0.01		0
S042-MC069_43_d17-27178	ACTTCTCCACAGGAGTCAGGTGC		0.42	0.01	0	0	0.04	0.02	0.08	99	0.02		0
S034-MC069_35_d17-27170	ACTTCTCCACAGGAGTCAGGTGC		0.38	0.01	0	0	0.01	0.01	0.13	98.99	0.01		0
S009-MC069_10_d17-27145	ACTTCTCCACAGGAGTCAGGTGC		0.41	0.01	0	0	0	0.02	0.1	98.96	0.02		0
S043-MC069_44_d17-27179	ACTTCTCCACAGGAGTCAGGTGC		0.38	0.01	0	0	0	0.02	0.08	98.96	0.02		0
S066-MC069_67_d17-27202	ACTTCTCCACAGGAGTCAGGTGC		0.39	0.01	0	0	0.01	0.01	0.08	98.95	0.03		0
S003-MC069_4_d17-27139	ACTTCTCCACAGGAGTCAGGTGC		0.48	0.01	0	0	0.01	0.01	0.11	98.94	0.01		0
S058-MC069_59_d17-27194	ACTTCTCCACAGGAGTCAGGTGC		0.38	0.01	0	0	0.01	0.01	0.08	98.94	0.01		0
S011-MC069_12_d17-27147	ACTTCTCCACAGGAGTCAGGTGC		0.45	0.01	0	0	0.01	0.02	0.06	98.92	0.01		0
S071-MC069_72_d17-27207	ACTTCTCCACAGGAGTCAGGTGC		0.49	0.01	0	0	0.01	0.01	0.11	98.92	0.01		0
S094-MC069_95_d17-27230	ACTTCTCCACAGGAGTCAGGTGC		0.48	0.02	0	0	0	0.01	0.1	98.92	0.02		0
S028-MC069_29_d17-27164	ACTTCTCCACAGGAGTCAGGTGC		0.43	0	0	0	0	0.02	0.13	98.91	0.02		0
S070-MC069_71_d17-27206	ACTTCTCCACAGGAGTCAGGTGC		0.46	0.02	0	0	0.01	0.01	0.13	98.91	0.01		0
S013-MC069_14_d17-27149	ACTTCTCCACAGGAGTCAGGTGC		0.5	0	0	0	0.01	0.01	0.09	98.9	0.03		0
S073-MC069_74_d17-27209	ACTTCTCCACAGGAGTCAGGTGC		0.42	0.01	0	0	0	0.01	0.15	98.9	0.02		0
S056-MC069_57_d17-27192	ACTTCTCCACAGGAGTCAGGTGC		0.41	0.01	0	0	0	0.02	0.08	98.89	0.02		0
S023-MC069_24_d17-27159	ACTTCTCCACAGGAGTCAGGTGC		0.51	0.01	0	0	0	0.03	0.13	98.88	0.01		0		bi	38	0.603175
S048-MC069_49_d17-27184	ACTTCTCCACAGGAGTCAGGTGC		0.49	0.01	0	0	0	0.01	0.1	98.86	0.01		0		mono	12	0.190476
S086-MC069_87_d17-27222	ACTTCTCCACAGGAGTCAGGTGC		0.47	0	0	0	0	0.02	0.16	98.85	0.02		0		Makassar, Makassar+S9P	8	0.126984
S055-MC069_56_d17-27191	ACTTCTCCACAGGAGTCAGGTGC		0.47	0.02	0	0	0.01	0.03	0.09	98.83	0.02		0		Makassar, Makassar+5T	2	0.031746
S032-MC069_33_d17-27168	ACTTCTCCACAGGAGTCAGGTGC		0.52	0	0	0	0.01	0.01	0.2	98.76	0.02		0		Makassar, Hbs+10G+11G	1	0.015873
S017-MC069_18_d17-27153	ACTTCTCCACAGGAGTCAGGTGC		0.52	0.01	0	0	0.01	0.01	0.12	98.75	0.02		0		Makassar, HbS+5T	1	0.015873
S031-MC069_32_d17-27167	ACTTCTCCACAGGAGTCAGGTGC		0.57	0.03	0	0	0	0.01	0.15	98.74	0.02		0		Makassar+S9P mono	1	0.015873
S061-MC069_62_d17-27197	ACTTCTCCACAGGAGTCAGGTGC		0.69	0.01	0	0	0	0.01	0.12	98.66	0.02		0			63
S069-MC069_70_d17-27205	ACTTCTCCACAGGAGTCAGGTGC		0.7	0.04	0	0	0.01	0.01	0.15	98.64	0.01		0
S047-MC069_48_d17-27183	ACTTCTCCACAGGAGTCAGGTGC		0.54	0.01	0	0	0.01	0.01	0.26	98.49	0.01		0
S065-MC069_66_d17-27201	ACTTCTCCACAGGAGTCAGGTGC		0.46	0	0	0	0	0.02	0.12	98.45	0.02		0
S006-MC069_7_d17-27142	ACTTCTCCACAGGAGTCAGGTGC		0.53	0.01	0	0	0.01	0.01	1.01	97.74	0.01		0
S074-MC069_75_d17-27210	ACTTCTCCACAGGAGTCAGGTGC		0.7	0.8	0	0	0	0.01	0.43	97.58	0.02		0
S040-MC069_41_d17-27176	ACTTCTCCACAGGAGTCAGGTGC		0.56	0.01	0	0.01	0.01	0.01	0.21	97.32	0.02		0
S004-MC069_5_d17-27140	ACTTCTCCACAGGAGTCAGGTGC		2.85	0.01	0	0	0.01	0	0.11	96.5	0.02		0
S050-MC069_51_d17-27186	ACTTCTCCACAGGAGTCAGGTGC		0.26	0	0	0	0.01	0.01	44.97	54.06	0.02		0
S041-MC069_42_d17-27177	ACTTCTCCACAGGAGTCAGGTGC		0.37	0.01	0	0	0	48.43	0.07	50.25	0.01		0
S062-MC069_63_d17-27198	ACTTCTCCACAGGAGTCAGGTGC		0.22	0.01	0	0	0.01	0	49.83	49.27	0.01		0
S095-MC069_96_d17-27231	ACTTCTCCACAGGAGTCAGGTGC		0.23	0.01	0	0	0	0	49.86	49.22	0		0
S026-MC069_27_d17-27162	ACTTCTCCACAGGAGTCAGGTGC		0.23	0.01	0	0	0.01	0	50.98	48.12	0.01		0
S029-MC069_30_d17-27165	ACTTCTCCACAGGAGTCAGGTGC		0.21	0.01	0	0	0	0	51.24	47.86	0.01		0
S088-MC069_89_d17-27224	ACTTCTCCACAGGAGTCAGGTGC		0.16	0.01	0	0	0	0	47.41	45.8	0.06		0
S077-MC069_78_d17-27213	ACTTCTCCACAGGAGTCAGGTGC		43.69	0.03	0	0	0	0	0.07	55.64	0		0
S067-MC069_68_d17-27203	ACTTCTCCACAGGAGTCAGGTGC		43.65	0.01	0	0	0.01	0.01	0.05	55.62	0.01		0
S045-MC069_46_d17-27181	ACTTCTCCACAGGAGTCAGGTGC		0.3	0.01	0	0.01	0	0.01	0.08	55.35	0.01		0
S035-MC069_36_d17-27171	ACTTCTCCACAGGAGTCAGGTGC		45.35	0	0	0	0	0	0.04	54.06	0.01		0
S083-MC069_84_d17-27219	ACTTCTCCACAGGAGTCAGGTGC		47.82	0	0	0	0	0	0.11	51.5	0		0
S038-MC069_39_d17-27174	ACTTCTCCACAGGAGTCAGGTGC		48.99	0.06	0	0	0	0	0.08	50.23	0		0
S078-MC069_79_d17-27214	ACTTCTCCACAGGAGTCAGGTGC		48.74	0	0	0	0	0.01	0.07	49.7	0.01		0
S075-MC069_76_d17-27211	ACTTCTCCACAGGAGTCAGGTGC		50.08	0.02	0	0	0.01	0.01	0.09	49.21	0.02		0
S091-MC069_92_d17-27227	ACTTCTCCACAGGAGTCAGGTGC		0.19	0.02	0	0.01	0.01	0	0.1	48.52	0.01		0
S005-MC069_6_d17-27141	ACTTCTCCACAGGAGTCAGGTGC		51.02	0	0	0	0	0	0.05	48.41	0.02		0.01
S025-MC069_26_d17-27161	ACTTCTCCACAGGAGTCAGGTGC		51.03	0	0	0	0	0.01	0.07	48.32	0		0
S082-MC069_83_d17-27218	ACTTCTCCACAGGAGTCAGGTGC		0.21	0	0	0.01	0	0.01	0.16	47.8	0.01		0
S072-MC069_73_d17-27208	ACTTCTCCACAGGAGTCAGGTGC		0.34	46.4	0.01	0	0	0.01	0.07	52.43	0.01		0
S007-MC069_8_d17-27143	ACTTCTCCACAGGAGTCAGGTGC		0.29	46.94	0.01	0	0	0	0.1	51.69	0		0.01
S002-MC069_3_d17-27138	ACTTCTCCACAGGAGTCAGGTGC		0.34	47.51	0	0	0	0.01	0.06	51.22	0.01		0
S019-MC069_20_d17-27155	ACTTCTCCACAGGAGTCAGGTGC		0.3	46.69	0.01	0	0.01	0.01	0.07	50.89	0		0
S030-MC069_31_d17-27166	ACTTCTCCACAGGAGTCAGGTGC		0.37	47.56	0	0	0.01	0.02	0.13	50.87	0.01		0
S016-MC069_17_d17-27152	ACTTCTCCACAGGAGTCAGGTGC		0.43	47.64	0.01	0	0	0	0.13	50.78	0.03		0
S036-MC069_37_d17-27172	ACTTCTCCACAGGAGTCAGGTGC		0.34	48.36	0.02	0	0	0.01	0.1	50.31	0.02		0
S093-MC069_94_d17-27229	ACTTCTCCACAGGAGTCAGGTGC		0.28	48.41	0.01	0	0.01	0.01	0.23	50.27	0.02		0
S068-MC069_69_d17-27204	ACTTCTCCACAGGAGTCAGGTGC		0.32	0	0	0.02	47.07	0	0.07	51.8	0.01		0
S020-MC069_21_d17-27156	ACTTCTCCACAGGAGTCAGGTGC		0.14	0	0	0.01	49.13	0	0.03	2.43	47.12		0
S000-MC069_1_d17-27136	ACTTCTCCACAGGAGTCAGGTGC		1.52	0.01	0	0	0.01	0	0.11	48.1	0.01		48.25
S044-MC069_45_d17-27180	ACTTCTCCACAGGAGTCAGGTGC		0.25	0.01	0	49.97	0.05	0.01	0.05	47.97	0.01		0
S008-MC069_9_d17-27144	ACTTCTCCACAGGAGTCAGGTGC		52.37	0.79	43.22	0	0	0	0.01	0.96	1.22		0

## Sheet: 684 50
684	target_site_seq	11G	1G_9G_11G	5T_9G_11G	9G	9G_11G	9G_11G_14G
S247-MC069_248_d17-27383	ACTTCTCCACAGGAGTCAGGTGC	0.38	0.01	0	0.08	99.07	0.02
S243-MC069_244_d17-27379	ACTTCTCCACAGGAGTCAGGTGC	0.42	0	0.01	0.1	98.98	0.03
S233-MC069_234_d17-27369	ACTTCTCCACAGGAGTCAGGTGC	0.45	0.01	0.01	0.06	98.97	0.03
S286-MC069_287_d17-27422	ACTTCTCCACAGGAGTCAGGTGC	0.39	0	0.01	0.1	98.96	0.02
S215-MC069_216_d17-27351	ACTTCTCCACAGGAGTCAGGTGC	0.43	0.01	0.01	0.1	98.96	0.02
S263-MC069_264_d17-27399	ACTTCTCCACAGGAGTCAGGTGC	0.43	0	0	0.08	98.95	0.04
S221-MC069_222_d17-27357	ACTTCTCCACAGGAGTCAGGTGC	0.46	0.01	0	0.1	98.94	0.02
S273-MC069_274_d17-27409	ACTTCTCCACAGGAGTCAGGTGC	0.43	0	0	0.1	98.93	0.02
S287-MC069_288_d17-27423	ACTTCTCCACAGGAGTCAGGTGC	0.49	0	0	0.04	98.9	0.02
S199-MC069_200_d17-27335	ACTTCTCCACAGGAGTCAGGTGC	0.42	0.01	0.01	0.13	98.9	0.03
S260-MC069_261_d17-27396	ACTTCTCCACAGGAGTCAGGTGC	0.39	0.01	0.01	0.17	98.9	0.02
S267-MC069_268_d17-27403	ACTTCTCCACAGGAGTCAGGTGC	0.44	0.01	0.01	0.11	98.89	0
S279-MC069_280_d17-27415	ACTTCTCCACAGGAGTCAGGTGC	0.55	0	0	0.08	98.87	0.03
S268-MC069_269_d17-27404	ACTTCTCCACAGGAGTCAGGTGC	0.47	0.01	0	0.09	98.86	0.02
S280-MC069_281_d17-27416	ACTTCTCCACAGGAGTCAGGTGC	0.41	0.02	0.01	0.1	98.85	0.03		bi	48	0.727273
S278-MC069_279_d17-27414	ACTTCTCCACAGGAGTCAGGTGC	0.52	0	0.01	0.1	98.81	0.01		mono	11	0.166667
S205-MC069_206_d17-27341	ACTTCTCCACAGGAGTCAGGTGC	0.52	0	0.01	0.08	98.8	0.02		Makassar+5T, Makassar	3	0.0454545
S196-MC069_197_d17-27332	ACTTCTCCACAGGAGTCAGGTGC	0.4	0	0	0.12	98.77	0.03		Makassar+S9P mono	1	0.0151515
S244-MC069_245_d17-27380	ACTTCTCCACAGGAGTCAGGTGC	0.64	0.01	0.01	0.13	98.77	0.01		unedited	1	0.0151515
S230-MC069_231_d17-27366	ACTTCTCCACAGGAGTCAGGTGC	0.49	0.03	0	0.15	98.77	0.01		Makassar+S9P, Makassar	2	0.030303
S254-MC069_255_d17-27390	ACTTCTCCACAGGAGTCAGGTGC	0.39	0.01	0.01	0.1	98.76	0.02			66
S209-MC069_210_d17-27345	ACTTCTCCACAGGAGTCAGGTGC	0.6	0.01	0.01	0.13	98.75	0.01
S218-MC069_219_d17-27354	ACTTCTCCACAGGAGTCAGGTGC	0.41	0	0	0.33	98.72	0.02
S238-MC069_239_d17-27374	ACTTCTCCACAGGAGTCAGGTGC	0.59	0	0	0.13	98.72	0.02
S201-MC069_202_d17-27337	ACTTCTCCACAGGAGTCAGGTGC	0.44	0.01	0	0.12	98.72	0.01
S225-MC069_226_d17-27361	ACTTCTCCACAGGAGTCAGGTGC	0.46	0.01	0.01	0.13	98.69	0.01
S229-MC069_230_d17-27365	ACTTCTCCACAGGAGTCAGGTGC	0.55	0.01	0.01	0.13	98.65	0.03
S213-MC069_214_d17-27349	ACTTCTCCACAGGAGTCAGGTGC	0.46	0.24	0.01	0.15	98.65	0.01
S275-MC069_276_d17-27411	ACTTCTCCACAGGAGTCAGGTGC	0.67	0	0.01	0.15	98.57	0.02
S281-MC069_282_d17-27417	ACTTCTCCACAGGAGTCAGGTGC	0.42	0	0	0.13	98.56	0.02
S241-MC069_242_d17-27377	ACTTCTCCACAGGAGTCAGGTGC	0.54	0	0	0.11	98.55	0.02
S248-MC069_249_d17-27384	ACTTCTCCACAGGAGTCAGGTGC	0.37	0	0	0.12	98.49	0.03
S228-MC069_229_d17-27364	ACTTCTCCACAGGAGTCAGGTGC	0.96	0.01	0.01	0.14	98.39	0.01
S282-MC069_283_d17-27418	ACTTCTCCACAGGAGTCAGGTGC	0.98	0.02	0.01	0.09	98.26	0.03
S234-MC069_235_d17-27370	ACTTCTCCACAGGAGTCAGGTGC	0.48	0	0.6	0.19	98.14	0.02
S265-MC069_266_d17-27401	ACTTCTCCACAGGAGTCAGGTGC	0.41	0.03	0	0.78	97.12	0.01
S216-MC069_217_d17-27352	ACTTCTCCACAGGAGTCAGGTGC	2.15	0.01	0.34	0.18	96.76	0.02
S223-MC069_224_d17-27359	ACTTCTCCACAGGAGTCAGGTGC	2.63	0.01	0.01	0.11	96.72	0.01
S236-MC069_237_d17-27372	ACTTCTCCACAGGAGTCAGGTGC	3.24	0	0.02	0.16	96.07	0.02
S255-MC069_256_d17-27391	ACTTCTCCACAGGAGTCAGGTGC	0.44	0.01	0.01	3.23	95.88	0.01
S266-MC069_267_d17-27402	ACTTCTCCACAGGAGTCAGGTGC	0.37	0.01	0.01	3.46	95.68	0.01
S207-MC069_208_d17-27343	ACTTCTCCACAGGAGTCAGGTGC	0.7	0.01	0	0.16	94.04	0.04
S202-MC069_203_d17-27338	ACTTCTCCACAGGAGTCAGGTGC	0.45	0.01	0	0.1	93.86	0.1
S251-MC069_252_d17-27387	ACTTCTCCACAGGAGTCAGGTGC	0.24	0	0.01	49.92	49.17	0.01
S212-MC069_213_d17-27348	ACTTCTCCACAGGAGTCAGGTGC	0.21	0	0	50.47	48.6	0.01
S245-MC069_246_d17-27381	ACTTCTCCACAGGAGTCAGGTGC	0.23	0.01	0	50.72	48.3	0.02
S222-MC069_223_d17-27358	ACTTCTCCACAGGAGTCAGGTGC	0.27	0	0	50.51	48.29	0.01
S269-MC069_270_d17-27405	ACTTCTCCACAGGAGTCAGGTGC	0.19	0.01	0	50.98	48.12	0.01
S198-MC069_199_d17-27334	ACTTCTCCACAGGAGTCAGGTGC	46.34	0.02	0.01	0.1	52.38	0.05
S250-MC069_251_d17-27386	ACTTCTCCACAGGAGTCAGGTGC	0.23	0.01	0.01	0.04	51.74	47.24
S271-MC069_272_d17-27407	ACTTCTCCACAGGAGTCAGGTGC	47.76	0	0	0.06	51.58	0.03
S203-MC069_204_d17-27339	ACTTCTCCACAGGAGTCAGGTGC	0.2	0.01	0.01	0.07	51.23	0.01
S262-MC069_263_d17-27398	ACTTCTCCACAGGAGTCAGGTGC	0.97	0.01	0.01	0.07	50.02	0
S193-MC069_194_d17-27329	ACTTCTCCACAGGAGTCAGGTGC	0.22	0	0.01	0.08	49.87	0.01
S242-MC069_243_d17-27378	ACTTCTCCACAGGAGTCAGGTGC	49.85	0.01	0	0.05	49.59	0.01
S194-MC069_195_d17-27330	ACTTCTCCACAGGAGTCAGGTGC	0.39	0	0	0.17	49.39	0
S192-MC069_193_d17-27328	ACTTCTCCACAGGAGTCAGGTGC	50.02	0	0	0.09	49.19	0
S204-MC069_205_d17-27340	ACTTCTCCACAGGAGTCAGGTGC	50.98	0	0	0.06	48.42	0.01
S226-MC069_227_d17-27362	ACTTCTCCACAGGAGTCAGGTGC	51.13	0.01	0	0.04	48.28	0
S214-MC069_215_d17-27350	ACTTCTCCACAGGAGTCAGGTGC	0.28	0	44.24	0.09	54.45	0.01
S239-MC069_240_d17-27375	ACTTCTCCACAGGAGTCAGGTGC	0.27	0	47.7	0.07	51.15	0.01
S259-MC069_260_d17-27395	ACTTCTCCACAGGAGTCAGGTGC	0.26	0	48.34	0.07	50.6	0
S285-MC069_286_d17-27421	ACTTCTCCACAGGAGTCAGGTGC	50.07	46.94	0	0.13	1.79	0
S227-MC069_228_d17-27363	ACTTCTCCACAGGAGTCAGGTGC	0.02	0	0	0.02	0.03	0
S264-MC069_265_d17-27400	ACTTCTCCACAGGAGTCAGGTGC	0.34	47.48	0	0.06	50.98	0.02
S200-MC069_201_d17-27336	ACTTCTCCACAGGAGTCAGGTGC	0.39	47.62	0	0.13	50.81	0.01

## Sheet: summary
s
		9G editing	617 50nM (n=63)	684 50nM (n=66)
		bi allelic	0.634921	0.772727
		mono allelic	0.190476	0.166667
		Makassar, Makassar+bystander bi	0.126984	0.030303
		Makassar+bystander mono	0.015873	0.0151515
		unedited	0	0.0151515
		Makassar, HbS+bystander	0.031746	0
