# Supplementary material for: Installation of HbG-Makassar by base editing restores hemoglobin function: a transformative therapy for sickle cell disease
Source: Research Square preprint supplement (doi:10.21203/rs.3.rs-3995314/v1), 2024-03-14
Supplement: Supplementary file 2 [file mobilized SC NGS summary.xlsx]

## Sheet: Sheet3
sample_name	reads_mapped_total	target_site_reads	mapping_rate	sample_name	target_site_seq	11G	1G_9G_11G	5T_9G_11G	7G_9G_11G	7T_9G_11G	8G_9G_11G	9G	9G_11G	9G_11G_14G
S301-SC106-95688	11523	11474	49.269	S301-SC106-95688	ACTTCTCCACAGGAGTCAGGTGC	0.44	0	0	0	0.01	0	0.49	98.62	0.02
S248-SC53-95635	34247	34140	64.664	S248-SC53-95635	ACTTCTCCACAGGAGTCAGGTGC	0.44	0.01	0	0	0.01	0	0.44	98.57	0
S270-SC75-95657	4043	4020	15.756	S270-SC75-95657	ACTTCTCCACAGGAGTCAGGTGC	0.52	0	0	0	0.03	0	0.42	98.48	0
S252-SC57-95639	8247	8211	30.333	S252-SC57-95639	ACTTCTCCACAGGAGTCAGGTGC	0.45	0.04	0	0	0	0	0.49	98.48	0.01
S343-SC148-95730	12956	12904	46.398	S343-SC148-95730	ACTTCTCCACAGGAGTCAGGTGC	0.5	0	0	0	0.01	0	0.43	98.46	0.01
S256-SC61-95643	20213	20116	54.805	S256-SC61-95643	ACTTCTCCACAGGAGTCAGGTGC	0.46	0.01	0.01	0.01	0.01	0	0.34	98.46	0.01
S318-SC123-95705	31637	31527	74.61	S318-SC123-95705	ACTTCTCCACAGGAGTCAGGTGC	0.5	0.01	0.01	0	0.01	0	0.42	98.45	0.01
S266-SC71-95653	23313	23245	54.903	S266-SC71-95653	ACTTCTCCACAGGAGTCAGGTGC	0.54	0	0	0	0	0	0.3	98.42	0.02
S316-SC121-95703	7644	7613	42.473	S316-SC121-95703	ACTTCTCCACAGGAGTCAGGTGC	0.45	0	0	0	0	0	0.58	98.36	0
S203-SC8-95590	9583	9550	31.94	S203-SC8-95590	ACTTCTCCACAGGAGTCAGGTGC	0.52	0	0	0.01	0	0	0.35	98.35	0.01
S277-SC82-95664	14578	14514	42.979	S277-SC82-95664	ACTTCTCCACAGGAGTCAGGTGC	0.5	0.01	0.01	0.01	0	0	0.5	98.35	0.01
S283-SC88-95670	17870	17804	46.005	S283-SC88-95670	ACTTCTCCACAGGAGTCAGGTGC	0.47	0	0.02	0	0.01	0	0.52	98.34	0.01
S333-SC138-95720	51569	51382	80.633	S333-SC138-95720	ACTTCTCCACAGGAGTCAGGTGC	0.53	0.01	0.01	0	0	0	0.4	98.33	0.01
S247-SC52-95634	14744	14685	41.312	S247-SC52-95634	ACTTCTCCACAGGAGTCAGGTGC	0.46	0.01	0.01	0.01	0.01	0	0.46	98.3	0.01
S297-SC102-95684	42735	42574	76.7	S297-SC102-95684	ACTTCTCCACAGGAGTCAGGTGC	0.52	0.01	0	0	0.01	0	0.54	98.29	0
S309-SC114-95696	8447	8413	38.585	S309-SC114-95696	ACTTCTCCACAGGAGTCAGGTGC	0.54	0	0	0	0	0.01	0.4	98.25	0.01		bi	69	0.831325
S236-SC41-95623	61597	61342	78.708	S236-SC41-95623	ACTTCTCCACAGGAGTCAGGTGC	0.51	0.01	0.01	0	0	0	0.53	98.25	0.01		mono	6	0.0722892
S290-SC95-95677	38149	37996	73.968	S290-SC95-95677	ACTTCTCCACAGGAGTCAGGTGC	0.51	0.01	0.01	0	0.01	0	0.49	98.25	0		un	3	0.0361446
S279-SC84-95666	28574	28443	58.583	S279-SC84-95666	ACTTCTCCACAGGAGTCAGGTGC	0.51	0.01	0.01	0	0	0	0.58	98.25	0.03		Makassar, Makassar+S9P	2	0.0240964
S314-SC119-95701	19111	19041	63.155	S314-SC119-95701	ACTTCTCCACAGGAGTCAGGTGC	0.56	0.01	0.01	0	0	0.01	0.56	98.23	0		Makassar, Makassar+7T	1	0.0120482
S196-SC1-95583	19192	19114	44.593	S196-SC1-95583	ACTTCTCCACAGGAGTCAGGTGC	0.51	0	0.01	0.01	0.02	0	0.6	98.22	0.02		Makassar, Makassar+7G	1	0.0120482
S298-SC103-95685	23845	23747	63.483	S298-SC103-95685	ACTTCTCCACAGGAGTCAGGTGC	0.58	0	0	0	0.01	0.01	0.57	98.21	0.01		Makassar, Makassar+8G	1	0.0120482
S243-SC48-95630	41264	41069	69.18	S243-SC48-95630	ACTTCTCCACAGGAGTCAGGTGC	0.5	0.01	0.01	0	0.01	0	0.49	98.19	0.02
S305-SC110-95692	47623	47455	78.405	S305-SC110-95692	ACTTCTCCACAGGAGTCAGGTGC	0.49	0.01	0	0	0.01	0	0.46	98.19	0.02			83
S237-SC42-95624	24932	24822	58.195	S237-SC42-95624	ACTTCTCCACAGGAGTCAGGTGC	0.54	0.01	0	0	0	0	0.56	98.18	0.01
S282-SC87-95669	10576	10528	34.568	S282-SC87-95669	ACTTCTCCACAGGAGTCAGGTGC	0.51	0	0	0	0	0	0.42	98.17	0.01
S300-SC105-95687	60582	60351	82.44	S300-SC105-95687	ACTTCTCCACAGGAGTCAGGTGC	0.54	0	0	0	0.01	0	0.48	98.13	0.01
S284-SC89-95671	9036	9010	32.616	S284-SC89-95671	ACTTCTCCACAGGAGTCAGGTGC	0.74	0.01	0.01	0	0.02	0.02	0.58	98.12	0.01
S325-SC130-95712	4300	4275	25.399	S325-SC130-95712	ACTTCTCCACAGGAGTCAGGTGC	0.49	0.02	0	0	0.02	0	0.44	98.11	0.02
S323-SC128-95710	47020	46857	81.338	S323-SC128-95710	ACTTCTCCACAGGAGTCAGGTGC	0.53	0.01	0	0	0.01	0	0.57	98.1	0.02
S344-SC149-95731	45896	45700	84.785	S344-SC149-95731	ACTTCTCCACAGGAGTCAGGTGC	0.55	0	0.01	0	0.01	0.01	0.59	98.09	0.01
S294-SC99-95681	21480	21393	57.481	S294-SC99-95681	ACTTCTCCACAGGAGTCAGGTGC	0.45	0.01	0.01	0.01	0.01	0	0.36	98.08	0.01
S260-SC65-95647	34035	33913	64.769	S260-SC65-95647	ACTTCTCCACAGGAGTCAGGTGC	0.75	0.02	0.01	0	0	0	0.53	98.06	0.02
S311-SC116-95698	9346	9309	41.337	S311-SC116-95698	ACTTCTCCACAGGAGTCAGGTGC	0.51	0	0.01	0	0.01	0	0.42	97.99	0.02
S273-SC78-95660	15327	15254	38.53	S273-SC78-95660	ACTTCTCCACAGGAGTCAGGTGC	0.45	0	0.01	0.02	0	0	0.54	97.99	0.01
S197-SC2-95584	16770	16698	46.088	S197-SC2-95584	ACTTCTCCACAGGAGTCAGGTGC	0.5	0.01	0.01	0.01	0	0	0.61	97.96	0.02
S331-SC136-95718	16717	16649	58.823	S331-SC136-95718	ACTTCTCCACAGGAGTCAGGTGC	0.47	0	0	0	0.01	0.01	0.46	97.95	0.01
S306-SC111-95693	25926	25841	66.664	S306-SC111-95693	ACTTCTCCACAGGAGTCAGGTGC	0.5	0.01	0	0	0	0	0.52	97.93	0.03
S324-SC129-95711	41883	41714	77.644	S324-SC129-95711	ACTTCTCCACAGGAGTCAGGTGC	0.6	0.01	0	0	0.01	0	0.55	97.89	0.11
S269-SC74-95656	16201	16129	46.141	S269-SC74-95656	ACTTCTCCACAGGAGTCAGGTGC	0.52	0.03	0.01	0	0	0	0.55	97.85	0.01
S232-SC37-95619	35929	35802	61.526	S232-SC37-95619	ACTTCTCCACAGGAGTCAGGTGC	0.65	0	0	0	0	0	0.82	97.8	0.02
S206-SC11-95593	6928	6904	24.64	S206-SC11-95593	ACTTCTCCACAGGAGTCAGGTGC	0.77	0.01	0	0	0.01	0	0.8	97.78	0.03
S229-SC34-95616	45963	45726	72.92	S229-SC34-95616	ACTTCTCCACAGGAGTCAGGTGC	0.59	0	0.01	0	0	0	0.75	97.78	0.01
S285-SC90-95672	42164	41990	66.868	S285-SC90-95672	ACTTCTCCACAGGAGTCAGGTGC	0.99	0	0	0	0.01	0.01	0.54	97.77	0.1
S335-SC140-95722	26281	26176	62.349	S335-SC140-95722	ACTTCTCCACAGGAGTCAGGTGC	0.53	0	0	0	0.01	0	0.43	97.75	0.01
S329-SC134-95716	19922	19840	60.42	S329-SC134-95716	ACTTCTCCACAGGAGTCAGGTGC	0.53	0	0	0	0	0	0.55	97.71	0.01
S215-SC20-95602	25948	25814	56.041	S215-SC20-95602	ACTTCTCCACAGGAGTCAGGTGC	0.65	0	0.01	0	0	0	0.64	97.68	0.01
S312-SC117-95699	13338	13282	53.078	S312-SC117-95699	ACTTCTCCACAGGAGTCAGGTGC	0.61	0.01	0	0	0	0	0.87	97.67	0.01
S302-SC107-95689	4622	4606	25.59	S302-SC107-95689	ACTTCTCCACAGGAGTCAGGTGC	0.48	0	0	0	0.02	0	1.26	97.61	0
S259-SC64-95646	24038	23943	54.649	S259-SC64-95646	ACTTCTCCACAGGAGTCAGGTGC	0.54	0	0	0	0.01	0	0.55	97.57	0.01
S254-SC59-95641	9601	9561	34.882	S254-SC59-95641	ACTTCTCCACAGGAGTCAGGTGC	0.6	0	0	0	0.01	0.01	0.5	97.56	0.02
S332-SC137-95719	5063	5046	29.107	S332-SC137-95719	ACTTCTCCACAGGAGTCAGGTGC	0.63	0	0	0	0	0	0.46	97.54	0
S327-SC132-95714	46559	46358	77.531	S327-SC132-95714	ACTTCTCCACAGGAGTCAGGTGC	0.49	0.01	0.01	0	0	0	0.43	97.5	0.01
S230-SC35-95617	7772	7748	27.495	S230-SC35-95617	ACTTCTCCACAGGAGTCAGGTGC	0.71	0	0.01	0.03	0	0	0.89	97.39	0
S216-SC21-95603	19456	19378	47.834	S216-SC21-95603	ACTTCTCCACAGGAGTCAGGTGC	0.54	0.01	0.01	0.01	0.01	0	0.97	97.38	0.02
S304-SC109-95691	23031	22941	64.685	S304-SC109-95691	ACTTCTCCACAGGAGTCAGGTGC	0.61	0	0	0	0.01	0	0.89	97.31	0.01
S261-SC66-95648	21952	21863	55.93	S261-SC66-95648	ACTTCTCCACAGGAGTCAGGTGC	2.18	0.01	0.01	0.01	0.01	0.01	0.38	96.89	0.02
S274-SC79-95661	6270	6254	23.835	S274-SC79-95661	ACTTCTCCACAGGAGTCAGGTGC	0.51	0	0	0.02	0.03	0	0.46	96.79	0
S321-SC126-95708	9006	8968	44.801	S321-SC126-95708	ACTTCTCCACAGGAGTCAGGTGC	0.51	0.01	0.01	0	0.01	0	0.42	96.29	0
S245-SC50-95632	48412	48208	72.811	S245-SC50-95632	ACTTCTCCACAGGAGTCAGGTGC	0.59	0.01	3.64	0	0.01	0	0.46	94.56	0.01
S281-SC86-95668	25043	24972	55.332	S281-SC86-95668	ACTTCTCCACAGGAGTCAGGTGC	0.43	0.02	0	0	0	0	1.45	90.11	0.02
S310-SC115-95697	15858	15801	56.615	S310-SC115-95697	ACTTCTCCACAGGAGTCAGGTGC	0.31	0	0.01	0	0	0	0.28	53.6	44.63
S231-SC36-95618	34953	34801	58.949	S231-SC36-95618	ACTTCTCCACAGGAGTCAGGTGC	0.39	0	46.55	0	0	0	0.32	51.27	0.01
S200-SC5-95587	37700	37551	59.815	S200-SC5-95587	ACTTCTCCACAGGAGTCAGGTGC	0.28	0	0	0	0.01	0	50.18	48.53	0.01
S204-SC9-95591	22106	22028	49.257	S204-SC9-95591	ACTTCTCCACAGGAGTCAGGTGC	0.29	0	0.01	0	0	0	51.36	47.42	0.01
S220-SC25-95607	12947	12898	37.518	S220-SC25-95607	ACTTCTCCACAGGAGTCAGGTGC	0.3	0	0	0	0	0	51.62	47.04	0
S234-SC39-95621	16493	16438	44.836	S234-SC39-95621	ACTTCTCCACAGGAGTCAGGTGC	0.22	0.01	0	0	0	0	52.32	46.72	0.01
S320-SC125-95707	16577	16493	58.131	S320-SC125-95707	ACTTCTCCACAGGAGTCAGGTGC	0.33	0	0.01	0.01	0.01	0	0.52	45.58	52.27
S222-SC27-95609	21957	21851	54.044	S222-SC27-95609	ACTTCTCCACAGGAGTCAGGTGC	0.23	0	0	0	0	0	0.4	46.62	51.7
S233-SC38-95620	10678	10634	31.723	S233-SC38-95620	ACTTCTCCACAGGAGTCAGGTGC	45.01	0.01	0	0.01	0.01	0	0.35	53.02	0
S265-SC70-95652	37842	37711	64.72	S265-SC70-95652	ACTTCTCCACAGGAGTCAGGTGC	50.63	0	0.01	0	0	0	0.29	47.94	0.01
S328-SC133-95715	28507	28418	71.299	S328-SC133-95715	ACTTCTCCACAGGAGTCAGGTGC	51.23	0	0	0	0	0	0.42	47.03	0.01
S308-SC113-95695	6113	6089	30.406	S308-SC113-95695	ACTTCTCCACAGGAGTCAGGTGC	55.89	0	0	0	0	0	0.23	43.18	0
S296-SC101-95683	54837	54571	81.916	S296-SC101-95683	ACTTCTCCACAGGAGTCAGGTGC	49.29	0	0	0	0	0	48.4	0.03	0
S246-SC51-95633	29108	29008	60.757	S246-SC51-95633	ACTTCTCCACAGGAGTCAGGTGC	0	0	0	0	0	0	48.82	0.03	0
S276-SC81-95663	9035	9000	32.801	S276-SC81-95663	ACTTCTCCACAGGAGTCAGGTGC	0.01	0	0	0	0.02	0	0.01	0.04	0
S212-SC17-95599	19455	19396	47.364	S212-SC17-95599	ACTTCTCCACAGGAGTCAGGTGC	0.01	0	0	0	0	0	0.01	0.01	0
S238-SC43-95625	54563	54435	78.725	S238-SC43-95625	ACTTCTCCACAGGAGTCAGGTGC	0.01	0	0	0	0	0	0.01	0.01	0
S205-SC10-95592	14445	14337	43.292	S205-SC10-95592	ACTTCTCCACAGGAGTCAGGTGC	0.41	51.31	0.01	0.01	0	0	0.34	45.94	0.01
S345-SC150-95732	39448	39252	73.95	S345-SC150-95732	ACTTCTCCACAGGAGTCAGGTGC	0.35	47.94	0.01	0	0	0	0.28	49.93	0.01
S278-SC83-95665	18900	18819	48.676	S278-SC83-95665	ACTTCTCCACAGGAGTCAGGTGC	0.27	0	0.01	48.08	0.02	0	0.32	50.3	0
S330-SC135-95717	17465	17373	58.827	S330-SC135-95717	ACTTCTCCACAGGAGTCAGGTGC	0.44	0	0.01	0	0.01	44.63	0.32	53.06	0.01
S322-SC127-95709	29405	29270	73.591	S322-SC127-95709	ACTTCTCCACAGGAGTCAGGTGC	0.42	0	0	0	49.75	0	0.3	48.4	0
