# Supplementary material for: Installation of HbG-Makassar by base editing restores hemoglobin function: a transformative therapy for sickle cell disease
Source: Research Square preprint supplement (doi:10.21203/rs.3.rs-3995314/v1), 2024-03-14
Supplement: Supplementary file 3 [file non mobilized sc ngs summary.xlsx]

## Sheet: SC1
sample_name	target_site_seq	11G	1G_9G	1G_9G_11G	5A_9G_11G	5G_9G_11G	5T_9G_11G	7G_9G_11G	7T_9G_11G	9G	9G_11G	9G_11G_14G	9G_14G	mapping_rate	target_site_reads
S074-MC069_SC1-34_d11-25882	ACTTCTCCACAGGAGTCAGGTGC	0.07	0	0	0	0	0.01	0	0.02	0.06	99.22	0.01	0	82.797	18003
S157-MC069_SC1-164_d11-26012	ACTTCTCCACAGGAGTCAGGTGC	0.04	0	0	0	0	0.02	0	0.04	0.04	99.22	0	0	72.951	5268
S141-MC069_SC1-162_d11-26010	ACTTCTCCACAGGAGTCAGGTGC	0.11	0	0.01	0.02	0	0	0	0.01	0.06	99.19	0.02	0	79.15	11410
S045-MC069_SC1-66_d11-25914	ACTTCTCCACAGGAGTCAGGTGC	0.09	0	0.01	0.02	0	0.01	0	0.01	0.09	99.16	0.02	0	92.241	37594
S079-MC069_SC1-94_d11-25942	ACTTCTCCACAGGAGTCAGGTGC	0.09	0	0.01	0.02	0	0.01	0	0.01	0.07	99.14	0.02	0	92.962	42714
S073-MC069_SC1-22_d11-25870	ACTTCTCCACAGGAGTCAGGTGC	0.12	0	0.02	0.02	0	0	0	0.01	0.08	99.13	0.03	0	83.498	17678
S050-MC069_SC1-31_d11-25879	ACTTCTCCACAGGAGTCAGGTGC	0.1	0	0.01	0	0.01	0.01	0	0.01	0.06	99.12	0	0	93.49	38694
S065-MC069_SC1-21_d11-25869	ACTTCTCCACAGGAGTCAGGTGC	0.08	0	0	0.02	0	0	0	0	0.12	99.12	0.01	0	87.689	24951
S180-MC069_SC1-155_d11-26003	ACTTCTCCACAGGAGTCAGGTGC	0.11	0	0.01	0.01	0	0.01	0	0.01	0.11	99.11	0.01	0	86.532	16002
S048-MC069_SC1-7_d11-25855	ACTTCTCCACAGGAGTCAGGTGC	0.09	0	0.02	0.02	0.01	0.01	0	0.01	0.06	99.09	0.02	0	92.62	43549
S053-MC069_SC1-67_d11-25915	ACTTCTCCACAGGAGTCAGGTGC	0.12	0	0.02	0.01	0	0.01	0	0.01	0.08	99.09	0.02	0	93.834	42872
S069-MC069_SC1-69_d11-25917	ACTTCTCCACAGGAGTCAGGTGC	0.12	0	0	0	0	0.02	0	0.01	0.04	99.09	0.03	0	81.213	9747
S095-MC069_SC1-96_d11-25944	ACTTCTCCACAGGAGTCAGGTGC	0.11	0	0	0	0	0	0	0.01	0.07	99.09	0.02	0	82.754	22598
S151-MC069_SC1-187_d11-26035	ACTTCTCCACAGGAGTCAGGTGC	0.08	0	0.02	0.02	0.02	0	0	0.01	0.12	99.09	0.01	0	85.825	18202
S178-MC069_SC1-131_d11-25979	ACTTCTCCACAGGAGTCAGGTGC	0.11	0	0	0	0	0	0	0.01	0.07	99.09	0.03	0	94.343	29226
S142-MC069_SC1-174_d11-26022	ACTTCTCCACAGGAGTCAGGTGC	0.1	0	0.01	0.01	0	0	0.01	0	0.05	99.08	0.02	0	97.992	43541
S187-MC069_SC1-144_d11-25992	ACTTCTCCACAGGAGTCAGGTGC	0.1	0	0.01	0.01	0	0	0	0	0.09	99.08	0.02	0	94.48	39642
S055-MC069_SC1-91_d11-25939	ACTTCTCCACAGGAGTCAGGTGC	0.11	0	0.01	0.01	0	0.01	0.01	0	0.1	99.07	0.02	0	84.643	22118
S058-MC069_SC1-32_d11-25880	ACTTCTCCACAGGAGTCAGGTGC	0.07	0	0	0.01	0	0.01	0	0.01	0.07	99.07	0.03	0	86.36	23100
S083-MC069_SC1-47_d11-25895	ACTTCTCCACAGGAGTCAGGTGC	0.09	0	0.01	0.02	0	0	0	0.01	0.09	99.07	0.02	0	93.074	41293
S124-MC069_SC1-148_d11-25996	ACTTCTCCACAGGAGTCAGGTGC	0.14	0	0.01	0.01	0.01	0.01	0	0.01	0.1	99.07	0.01	0	84.034	14504
S163-MC069_SC1-141_d11-25989	ACTTCTCCACAGGAGTCAGGTGC	0.1	0	0.01	0.02	0	0.03	0.01	0.01	0.07	99.07	0.02	0	86.846	17565
S028-MC069_SC1-52_d11-25900	ACTTCTCCACAGGAGTCAGGTGC	0.11	0	0.01	0	0	0	0.01	0	0.13	99.06	0.01	0	71.31	7039
S063-MC069_SC1-92_d11-25940	ACTTCTCCACAGGAGTCAGGTGC	0.1	0	0.01	0.01	0	0.01	0	0.02	0.08	99.06	0.02	0	94.313	45143
S131-MC069_SC1-137_d11-25985	ACTTCTCCACAGGAGTCAGGTGC	0.14	0	0	0.03	0	0	0	0.01	0.09	99.06	0.01	0	79.681	9945
S015-MC069_SC1-86_d11-25934	ACTTCTCCACAGGAGTCAGGTGC	0.09	0	0.01	0.02	0	0.01	0	0.02	0.11	99.05	0.02	0	95.716	54320
S031-MC069_SC1-88_d11-25936	ACTTCTCCACAGGAGTCAGGTGC	0.11	0	0	0.01	0	0	0	0.01	0.09	99.05	0.01	0	94.45	45021
S043-MC069_SC1-42_d11-25890	ACTTCTCCACAGGAGTCAGGTGC	0.09	0	0.01	0.01	0	0	0	0	0.09	99.05	0.01	0	92.875	34317
S078-MC069_SC1-82_d11-25930	ACTTCTCCACAGGAGTCAGGTGC	0.1	0	0.01	0.01	0	0.01	0	0.01	0.08	99.04	0.02	0	91.839	36778
S092-MC069_SC1-60_d11-25908	ACTTCTCCACAGGAGTCAGGTGC	0.08	0	0.01	0.02	0	0	0	0.02	0.05	99.04	0.01	0	88.582	26575
S111-MC069_SC1-182_d11-26030	ACTTCTCCACAGGAGTCAGGTGC	0.1	0	0	0	0.01	0.03	0	0.01	0.12	99.04	0.01	0	80.538	11451
S054-MC069_SC1-79_d11-25927	ACTTCTCCACAGGAGTCAGGTGC	0.08	0	0.02	0.01	0	0	0	0	0.07	99.03	0.01	0	88.541	29858
S084-MC069_SC1-59_d11-25907	ACTTCTCCACAGGAGTCAGGTGC	0.11	0	0	0.01	0	0.01	0	0.01	0.11	99.02	0.02	0	93.495	38515
S098-MC069_SC1-121_d11-25969	ACTTCTCCACAGGAGTCAGGTGC	0.12	0	0.01	0	0.01	0.01	0	0.02	0.1	99.02	0.01	0	87.892	20739
S122-MC069_SC1-124_d11-25972	ACTTCTCCACAGGAGTCAGGTGC	0.09	0	0.01	0.02	0	0	0.01	0.01	0.07	99.02	0.02	0	89.08	27925
S165-MC069_SC1-165_d11-26013	ACTTCTCCACAGGAGTCAGGTGC	0.09	0	0.01	0.02	0.01	0	0.01	0.01	0.07	99.02	0.01	0	83.375	12849
S037-MC069_SC1-65_d11-25913	ACTTCTCCACAGGAGTCAGGTGC	0.13	0	0.01	0.02	0	0.01	0	0.01	0.08	99.01	0.02	0	92.258	34942
S081-MC069_SC1-23_d11-25871	ACTTCTCCACAGGAGTCAGGTGC	0.08	0	0.01	0.01	0	0.02	0	0	0.12	99.01	0	0	87.723	23849
S125-MC069_SC1-160_d11-26008	ACTTCTCCACAGGAGTCAGGTGC	0.12	0	0.01	0.01	0	0	0.01	0.01	0.09	99.01	0.02	0	93.347	36009
S003-MC069_SC1-37_d11-25885	ACTTCTCCACAGGAGTCAGGTGC	0.14	0	0	0.02	0	0	0	0	0.06	99	0.01	0	89.61	24829
S052-MC069_SC1-55_d11-25903	ACTTCTCCACAGGAGTCAGGTGC	0.12	0	0.01	0.01	0	0.01	0	0.01	0.08	99	0.02	0.01	93.723	42248
S064-MC069_SC1-9_d11-25857	ACTTCTCCACAGGAGTCAGGTGC	0.09	0	0.01	0	0.01	0.01	0	0.01	0.1	99	0.07	0	71.839	6987
S100-MC069_SC1-145_d11-25993	ACTTCTCCACAGGAGTCAGGTGC	0.11	0	0.01	0.02	0	0	0	0.02	0.09	99	0.01	0	88.625	25732
S143-MC069_SC1-186_d11-26034	ACTTCTCCACAGGAGTCAGGTGC	0.1	0	0.01	0.02	0	0.01	0.01	0.01	0.06	99	0.02	0	93.856	42049
S159-MC069_SC1-188_d11-26036	ACTTCTCCACAGGAGTCAGGTGC	0.17	0	0.03	0.03	0.07	0	0	0	0.03	99	0	0	61.524	2903
S101-MC069_SC1-157_d11-26005	ACTTCTCCACAGGAGTCAGGTGC	0.12	0	0	0	0	0.01	0	0.01	0.07	98.99	0.01	0	87.055	26368
S103-MC069_SC1-181_d11-26029	ACTTCTCCACAGGAGTCAGGTGC	0.1	0	0.01	0.02	0	0.01	0	0	0.08	98.99	0.02	0	95.551	47703
S170-MC069_SC1-130_d11-25978	ACTTCTCCACAGGAGTCAGGTGC	0.11	0	0.01	0.02	0	0.01	0.01	0.01	0.1	98.99	0.01	0	91.672	33791
S007-MC069_SC1-85_d11-25933	ACTTCTCCACAGGAGTCAGGTGC	0.13	0	0.01	0.01	0	0.01	0	0	0.09	98.98	0.02	0	90.742	44591
S051-MC069_SC1-43_d11-25891	ACTTCTCCACAGGAGTCAGGTGC	0.11	0	0.01	0.01	0	0.01	0	0.01	0.11	98.98	0.03	0	80.806	13240
S117-MC069_SC1-159_d11-26007	ACTTCTCCACAGGAGTCAGGTGC	0.13	0	0	0.01	0	0.01	0	0.01	0.09	98.98	0.02	0	82.211	11412
S129-MC069_SC1-113_d11-25961	ACTTCTCCACAGGAGTCAGGTGC	0.09	0	0.01	0.01	0	0	0	0.02	0.09	98.98	0.02	0	96.695	48489
S132-MC069_SC1-149_d11-25997	ACTTCTCCACAGGAGTCAGGTGC	0.11	0	0.01	0.01	0	0	0	0	0.09	98.98	0.02	0	86.476	18587
S070-MC069_SC1-81_d11-25929	ACTTCTCCACAGGAGTCAGGTGC	0.13	0	0	0.01	0	0.01	0	0.01	0.06	98.97	0.02	0	80.312	12814
S121-MC069_SC1-112_d11-25960	ACTTCTCCACAGGAGTCAGGTGC	0.11	0	0.01	0.03	0	0.01	0.01	0	0.09	98.97	0.02	0	89.075	28432
S169-MC069_SC1-118_d11-25966	ACTTCTCCACAGGAGTCAGGTGC	0.12	0	0.01	0.01	0	0.01	0.01	0.02	0.11	98.97	0.02	0	91.308	34294
S046-MC069_SC1-78_d11-25926	ACTTCTCCACAGGAGTCAGGTGC	0.1	0	0.01	0.01	0.01	0.01	0	0	0.09	98.96	0.02	0	92.923	34230
S183-MC069_SC1-191_d11-26039	ACTTCTCCACAGGAGTCAGGTGC	0.1	0	0.02	0.02	0	0	0	0.02	0.11	98.96	0	0	85.721	18399
S146-MC069_SC1-127_d11-25975	ACTTCTCCACAGGAGTCAGGTGC	0.09	0	0.01	0.02	0.01	0	0	0.01	0.05	98.95	0.02	0	94.178	32163
S147-MC069_SC1-139_d11-25987	ACTTCTCCACAGGAGTCAGGTGC	0.1	0	0.03	0.01	0	0.01	0	0.01	0.11	98.95	0.01	0.01	91.295	26805
S172-MC069_SC1-154_d11-26002	ACTTCTCCACAGGAGTCAGGTGC	0.1	0	0.03	0.02	0	0.01	0	0.01	0.09	98.95	0.01	0	92.62	31421
S013-MC069_SC1-62_d11-25910	ACTTCTCCACAGGAGTCAGGTGC	0.12	0	0.01	0.03	0	0.01	0	0.01	0.1	98.94	0.02	0	95.796	45764
S093-MC069_SC1-72_d11-25920	ACTTCTCCACAGGAGTCAGGTGC	0.15	0	0.01	0.03	0	0.01	0	0.01	0.09	98.94	0.03	0	91.261	34528
S126-MC069_SC1-172_d11-26020	ACTTCTCCACAGGAGTCAGGTGC	0.09	0	0.02	0	0.01	0.01	0	0.01	0.09	98.94	0	0	82.02	9809
S133-MC069_SC1-161_d11-26009	ACTTCTCCACAGGAGTCAGGTGC	0.18	0	0.03	0.01	0	0	0	0.03	0.09	98.94	0	0	83.104	12233
S018-MC069_SC1-27_d11-25875	ACTTCTCCACAGGAGTCAGGTGC	0.1	0	0.03	0.01	0	0.01	0	0	0.07	98.93	0	0	70.875	6755
S021-MC069_SC1-63_d11-25911	ACTTCTCCACAGGAGTCAGGTGC	0.07	0	0.02	0	0	0.02	0	0	0.18	98.93	0	0	75.272	5532
S057-MC069_SC1-20_d11-25868	ACTTCTCCACAGGAGTCAGGTGC	0.1	0	0.02	0.01	0	0	0	0	0.11	98.93	0.02	0	82.1	17668
S000-MC069_SC1-1_d11-25849	ACTTCTCCACAGGAGTCAGGTGC	0.11	0	0.02	0.01	0	0.01	0	0.01	0.13	98.92	0.02	0	93.152	52176
S038-MC069_SC1-77_d11-25925	ACTTCTCCACAGGAGTCAGGTGC	0.08	0	0.01	0.02	0	0	0	0	0.17	98.92	0.02	0	80.765	12667
S110-MC069_SC1-170_d11-26018	ACTTCTCCACAGGAGTCAGGTGC	0.11	0	0.02	0	0	0.02	0	0.01	0.05	98.92	0.01	0.03	92.386	29934
S116-MC069_SC1-147_d11-25995	ACTTCTCCACAGGAGTCAGGTGC	0.12	0	0.01	0.04	0	0.03	0	0.01	0.1	98.92	0.02	0	86.75	15388
S008-MC069_SC1-2_d11-25850	ACTTCTCCACAGGAGTCAGGTGC	0.09	0	0	0.02	0	0.01	0	0.01	0.13	98.87	0.04	0	79.689	15392
S109-MC069_SC1-158_d11-26006	ACTTCTCCACAGGAGTCAGGTGC	0.11	0	0.01	0.01	0	0.03	0	0.01	0.08	98.87	0.05	0	81.319	12057
S060-MC069_SC1-56_d11-25904	ACTTCTCCACAGGAGTCAGGTGC	0.14	0	0.01	0	0.01	0.01	0	0.01	0.07	98.86	0.01	0	89.423	29592
S149-MC069_SC1-163_d11-26011	ACTTCTCCACAGGAGTCAGGTGC	0.17	0	0.05	0	0	0	0	0	0.12	98.85	0.03	0.02	76.093	5891
S164-MC069_SC1-153_d11-26001	ACTTCTCCACAGGAGTCAGGTGC	0.15	0	0.02	0	0	0.02	0.01	0.03	0.08	98.85	0.02	0	84.709	12794
S017-MC069_SC1-15_d11-25863	ACTTCTCCACAGGAGTCAGGTGC	0.1	0	0.02	0.01	0.01	0.01	0.01	0.04	0.12	98.83	0	0	82.302	17691
S077-MC069_SC1-70_d11-25918	ACTTCTCCACAGGAGTCAGGTGC	0.1	0	0.01	0.03	0	0.01	0	0.01	0.13	98.82	0.03	0	88.228	28052
S009-MC069_SC1-14_d11-25862	ACTTCTCCACAGGAGTCAGGTGC	0.12	0	0.02	0.01	0	0.02	0.01	0	0.08	98.8	0.01	0	86.156	25948
S138-MC069_SC1-126_d11-25974	ACTTCTCCACAGGAGTCAGGTGC	0.14	0	0.01	0.01	0	0.03	0	0.04	0.07	98.8	0	0	78.564	8075
S106-MC069_SC1-122_d11-25970	ACTTCTCCACAGGAGTCAGGTGC	0.14	0	0.02	0.02	0	0.02	0	0	0.11	98.78	0.02	0	77.554	5510
S094-MC069_SC1-84_d11-25932	ACTTCTCCACAGGAGTCAGGTGC	0.16	0	0.01	0.03	0	0	0.01	0.01	0.11	98.77	0.05	0	79.264	12680
S114-MC069_SC1-123_d11-25971	ACTTCTCCACAGGAGTCAGGTGC	0.13	0	0.02	0.01	0	0.02	0	0.01	0.12	98.77	0.03	0	84.632	12262
S144-MC069_SC1-103_d11-25951	ACTTCTCCACAGGAGTCAGGTGC	0.28	0	0	0	0	0.04	0	0	0.07	98.74	0	0	61.096	2848
S042-MC069_SC1-30_d11-25878	ACTTCTCCACAGGAGTCAGGTGC	0.16	0	0	0.02	0	0.05	0.02	0	0.05	98.71	0	0	67.995	5729
S090-MC069_SC1-36_d11-25884	ACTTCTCCACAGGAGTCAGGTGC	0.11	0	0.02	0.02	0	0.02	0	0	0.11	98.66	0.02	0	67.784	4482
S153-MC069_SC1-116_d11-25964	ACTTCTCCACAGGAGTCAGGTGC	0.22	0	0.01	0.01	0	0.01	0	0.01	0.67	98.35	0.03	0	92.39	37275
S162-MC069_SC1-129_d11-25977	ACTTCTCCACAGGAGTCAGGTGC	0.09	0	0.02	0.02	0	0.01	0	0.02	0.06	98.25	0.01	0	86.507	16984
S059-MC069_SC1-44_d11-25892	ACTTCTCCACAGGAGTCAGGTGC	0.24	0	0	0	0.16	0	0	0	0.16	98.24	0	0	36.774	1247
S120-MC069_SC1-100_d11-25948	ACTTCTCCACAGGAGTCAGGTGC	0.29	0.07	0	0.07	0	0.07	0	0	0.5	97.84	0	0	45.714	1392
S160-MC069_SC1-105_d11-25953	ACTTCTCCACAGGAGTCAGGTGC	0.17	0	0.01	0.02	0	0.01	0	0.03	2.01	97.12	0.02	0	84.678	17546
S152-MC069_SC1-104_d11-25952	ACTTCTCCACAGGAGTCAGGTGC	5.16	0	0.01	0	0.01	0	0	0.01	0.1	93.95	0.02	0	92.614	38750
S118-MC069_SC1-171_d11-26019	ACTTCTCCACAGGAGTCAGGTGC	5.62	0	0.01	0	0	0	0	0	0.07	93.61	0.03	0	94.003	29838
S075-MC069_SC1-46_d11-25894	ACTTCTCCACAGGAGTCAGGTGC	0.7	0	0.01	0.01	0	0.01	0.01	0.01	4.24	90.95	0.01	0	83.695	20848
S185-MC069_SC1-120_d11-25968	ACTTCTCCACAGGAGTCAGGTGC	0.16	0	0	0.02	0	0.02	0	0	43.22	56.06	0.02	0	65.134	4429
S029-MC069_SC1-64_d11-25912	ACTTCTCCACAGGAGTCAGGTGC	0.05	0	0	0	0	0	0	0	44.53	54.58	0.02	0	97.739	49849
S087-MC069_SC1-95_d11-25943	ACTTCTCCACAGGAGTCAGGTGC	0.08	0	0	0	0	0	0	0	46.68	52.38	0.02	0.01	85.07	25029
S150-MC069_SC1-175_d11-26023	ACTTCTCCACAGGAGTCAGGTGC	0.08	0.02	0.04	0.02	0	0.02	0.02	0	47.09	51.8	0.02	0	73.417	5154
S040-MC069_SC1-6_d11-25854	ACTTCTCCACAGGAGTCAGGTGC	0.39	0.07	0	0	0	0.04	0.04	0	48.19	50.78	0	0	57.806	2814
S167-MC069_SC1-189_d11-26037	ACTTCTCCACAGGAGTCAGGTGC	0.04	0.01	0	0	0	0.01	0	0.01	49.79	49.49	0.01	0	93.301	31434
S171-MC069_SC1-142_d11-25990	ACTTCTCCACAGGAGTCAGGTGC	0.07	0	0	0	0	0	0	0.01	49.82	49.35	0	0.01	89.93	23122
S140-MC069_SC1-150_d11-25998	ACTTCTCCACAGGAGTCAGGTGC	1.71	0	0.01	0.01	0	0.01	0	0	48.34	49.09	0.01	0.01	92.331	34059
S127-MC069_SC1-184_d11-26032	ACTTCTCCACAGGAGTCAGGTGC	0.06	0.02	0.03	0	0	0	0	0	50.09	48.82	0.02	0	74.689	6411			9G_11G bi allelic		96
S166-MC069_SC1-177_d11-26025	ACTTCTCCACAGGAGTCAGGTGC	0.07	0	0	0	0	0	0	0.01	50.51	48.67	0.01	0.01	95.576	31781			9G_11G, 9G bi allelic		19
S012-MC069_SC1-50_d11-25898	ACTTCTCCACAGGAGTCAGGTGC	0.05	0	0.03	0.01	0	0	0	0.01	50.5	48.62	0.01	0.01	89.705	35160			9G_11G, 9G_11G_14G bi allelic		1
S035-MC069_SC1-41_d11-25889	ACTTCTCCACAGGAGTCAGGTGC	0.07	0	0	0.01	0	0	0	0.01	50.65	48.46	0.01	0	89.637	30245			9G_11G, 5T_9G_11G bi allelic		4
S158-MC069_SC1-176_d11-26024	ACTTCTCCACAGGAGTCAGGTGC	0.07	0.01	0.01	0	0	0	0	0.01	51.26	47.77	0.01	0	87.122	17976			total		120	0.697674
S173-MC069_SC1-166_d11-26014	ACTTCTCCACAGGAGTCAGGTGC	0.07	0	0.01	0.01	0	0	0.01	0.01	51.57	47.63	0.01	0.01	85.024	17255
S088-MC069_SC1-12_d11-25860	ACTTCTCCACAGGAGTCAGGTGC	0.07	0	0.01	0.01	0	0	0	0	51.58	47.51	0.01	0.01	86.94	30193
S136-MC069_SC1-102_d11-25950	ACTTCTCCACAGGAGTCAGGTGC	0.05	0.01	0.01	0.01	0	0	0	0.01	51.61	47.48	0.01	0	88.544	19021			9G_11G mono		29	0.168605
S080-MC069_SC1-11_d11-25859	ACTTCTCCACAGGAGTCAGGTGC	0.07	0	0.02	0	0	0	0	0	50.88	48.26	0.01	0.01	95.381	47301			9G mono		1	0.00581395
S039-MC069_SC1-89_d11-25937	ACTTCTCCACAGGAGTCAGGTGC	0.06	0	0.01	0	0	0	0	0	51.04	48.11	0.01	0.01	92.355	45548
S002-MC069_SC1-25_d11-25873	ACTTCTCCACAGGAGTCAGGTGC	0.05	0.01	0.01	0.01	0	0	0	0	51.2	47.9	0.01	0.01	96.315	49567			11G mono		2	0.0116279
S102-MC069_SC1-169_d11-26017	ACTTCTCCACAGGAGTCAGGTGC	0.08	0	0	0	0	0	0	0.01	0.89	48.92	0.04	49.31	89.974	24484			completely unedited		1	0.00581395
S085-MC069_SC1-71_d11-25919	ACTTCTCCACAGGAGTCAGGTGC	0.1	0	0.01	0	0	47.48	0	0.03	0.07	51.15	0.01	0	74.621	6891			Makassar+S9P		6	0.0348837
S161-MC069_SC1-117_d11-25965	ACTTCTCCACAGGAGTCAGGTGC	0.12	0	0.01	0	0	47.99	0	0.01	0.05	50.97	0	0	88.93	22276			Makassar+S9P, Makassar		8	0.0465116
S024-MC069_SC1-4_d11-25852	ACTTCTCCACAGGAGTCAGGTGC	0.09	0	0.01	0.01	0.01	48.12	0	0	0.07	50.81	0.01	0	95.01	43749
S182-MC069_SC1-179_d11-26027	ACTTCTCCACAGGAGTCAGGTGC	0.11	0	0.02	0.02	0	50.58	0	0	0.15	48.25	0	0	73.551	4717
																		7T+Makassar, Makassar bi		2	0.0116279
																		7G+Makassar, Makassar bi		1	0.00581395
S168-MC069_SC1-106_d11-25954	ACTTCTCCACAGGAGTCAGGTGC	1.14	0	0.21	0	0	0	0	0	0.04	55.69	0.01	0	96.881	53900			5A+Makassar, Makassar bi		1	0.00581395
S119-MC069_SC1-183_d11-26031	ACTTCTCCACAGGAGTCAGGTGC	46.37	0	0.03	0	0	0.03	0	0.07	0.1	52.7	0	0	62.91	3004			5G+Makassar, Makassar bi		3	0.0174419
S091-MC069_SC1-48_d11-25896	ACTTCTCCACAGGAGTCAGGTGC	48.36	0	0	0.03	0	0	0	0	0.1	50.73	0	0	59.352	3168
S174-MC069_SC1-178_d11-26026	ACTTCTCCACAGGAGTCAGGTGC	48.59	0	0	0.01	0	0	0	0	0.06	50.37	0.02	0	87.913	23605			Total		174
S089-MC069_SC1-24_d11-25872	ACTTCTCCACAGGAGTCAGGTGC	48.85	0	0	0.01	0	0.01	0	0	0.06	50.1	0.01	0	89.405	34434
S062-MC069_SC1-80_d11-25928	ACTTCTCCACAGGAGTCAGGTGC	48.94	0	0	0	0.02	0.02	0	0	0.02	50.05	0.01	0	81.533	12900
S036-MC069_SC1-53_d11-25901	ACTTCTCCACAGGAGTCAGGTGC	49.12	0	0.01	0.01	0	0.01	0	0	0.06	50.02	0	0	87.963	29630
S033-MC069_SC1-17_d11-25865	ACTTCTCCACAGGAGTCAGGTGC	49.3	0	0	0	0	0	0	0	0.06	49.81	0.01	0	91.57	44913
S123-MC069_SC1-136_d11-25984	ACTTCTCCACAGGAGTCAGGTGC	49.22	0	0.01	0.01	0	0	0	0	0.07	49.76	0.01	0	90.643	33230
S186-MC069_SC1-132_d11-25980	ACTTCTCCACAGGAGTCAGGTGC	49.43	0	0.01	0	0	0	0	0.01	0.03	49.69	0.01	0	95.316	33534
S107-MC069_SC1-134_d11-25982	ACTTCTCCACAGGAGTCAGGTGC	42.43	0	0	0.01	0.03	0.01	0	0.01	0.05	49.66	0.06	0	92.904	30711
S112-MC069_SC1-99_d11-25947	ACTTCTCCACAGGAGTCAGGTGC	49.03	0	0	0.01	0	0.04	0	0.01	0.12	49.65	0.01	0	78.845	7239
S135-MC069_SC1-185_d11-26033	ACTTCTCCACAGGAGTCAGGTGC	49.78	0	0	0	0	0	0	0.01	0.05	49.42	0.01	0	94.301	44917
S177-MC069_SC1-119_d11-25967	ACTTCTCCACAGGAGTCAGGTGC	49.4	0	0.09	0	0	0	0	0	0.11	49.4	0.03	0	63.127	3496
S061-MC069_SC1-68_d11-25916	ACTTCTCCACAGGAGTCAGGTGC	50.1	0	0.01	0	0.01	0.01	0	0	0.04	49.15	0.01	0	93.944	42522
S032-MC069_SC1-5_d11-25853	ACTTCTCCACAGGAGTCAGGTGC	49.95	0	0.03	0	0	0	0	0.03	0.06	49.14	0.01	0	83.398	15537
S027-MC069_SC1-40_d11-25888	ACTTCTCCACAGGAGTCAGGTGC	50.01	0	0.01	0.01	0	0	0	0	0.11	49.09	0.01	0	94.689	45028
S067-MC069_SC1-45_d11-25893	ACTTCTCCACAGGAGTCAGGTGC	50.21	0	0	0	0	0.01	0	0	0.03	48.93	0.01	0	90.304	31391
S188-MC069_SC1-156_d11-26004	ACTTCTCCACAGGAGTCAGGTGC	0.06	0	0.01	0	0	0.01	0	0	0.09	48.78	0.01	0	97.044	38119
S190-MC069_SC1-180_d11-26028	ACTTCTCCACAGGAGTCAGGTGC	50.43	0	0.01	0.02	0	0	0	0.01	0.05	48.75	0.01	0	90.853	29454
S006-MC069_SC1-73_d11-25921	ACTTCTCCACAGGAGTCAGGTGC	0.07	0	0.02	0.01	0.01	0.01	0.01	0.01	0.06	48.69	0.01	0	82.44	14155
S076-MC069_SC1-58_d11-25906	ACTTCTCCACAGGAGTCAGGTGC	50.42	0	0	0	0	0.01	0	0.01	0.03	48.65	0.02	0	95.895	49324
S068-MC069_SC1-57_d11-25905	ACTTCTCCACAGGAGTCAGGTGC	50.59	0	0.01	0.01	0	0	0	0.01	0.08	48.42	0.01	0	85.025	15651
S023-MC069_SC1-87_d11-25935	ACTTCTCCACAGGAGTCAGGTGC	50.81	0	0	0	0	0.07	0.02	0	0.09	48.32	0.02	0	69.785	4601
S154-MC069_SC1-128_d11-25976	ACTTCTCCACAGGAGTCAGGTGC	0.07	0	0.01	0	0.01	0	0	0.01	0.05	48.27	0.01	0	97.605	39173
S020-MC069_SC1-51_d11-25899	ACTTCTCCACAGGAGTCAGGTGC	50.96	0	0	0	0	0.01	0	0.01	0.04	48.21	0.01	0	87.957	26265
S176-MC069_SC1-107_d11-25955	ACTTCTCCACAGGAGTCAGGTGC	0.12	0	0	0.01	0	0.01	0	0.01	0.07	48.05	0.01	0	91.274	39052
S096-MC069_SC1-97_d11-25945	ACTTCTCCACAGGAGTCAGGTGC	51.11	0	0.01	0.02	0.01	0	0.01	0	0.07	47.86	0.01	0.01	77.205	16069
S156-MC069_SC1-152_d11-26000	ACTTCTCCACAGGAGTCAGGTGC	51.98	0	0.01	0.01	0	0	0.01	0.01	0.05	47.28	0.01	0	88.025	20971
S181-MC069_SC1-167_d11-26015	ACTTCTCCACAGGAGTCAGGTGC	0.02	0.01	0	0	0	0	0	0	49.88	0.07	0	0.01	91.335	27204
S145-MC069_SC1-115_d11-25963	ACTTCTCCACAGGAGTCAGGTGC	48.69	0	0.01	0	0	0	0	0	0.02	0.06	0	0	95.118	44676
S137-MC069_SC1-114_d11-25962	ACTTCTCCACAGGAGTCAGGTGC	48.35	0	0	0	0	0	0	0	0.01	0.07	0	0	92.213	38545
S049-MC069_SC1-19_d11-25867	ACTTCTCCACAGGAGTCAGGTGC	49.34	0.03	48.41	0	0	0	0	0	0.02	1.13	0	0	87.172	24688
S072-MC069_SC1-10_d11-25858	ACTTCTCCACAGGAGTCAGGTGC	50.52	0.03	47.34	0	0	0	0	0	0.01	1.12	0	0	93.738	43518
S041-MC069_SC1-18_d11-25866	ACTTCTCCACAGGAGTCAGGTGC	51.07	0.04	46.81	0	0	0	0	0	0.02	1.09	0	0	92.127	42174
S175-MC069_SC1-190_d11-26038	ACTTCTCCACAGGAGTCAGGTGC	51.84	0.04	46.17	0	0	0	0	0	0.05	1.03	0	0	80.622	10495
S034-MC069_SC1-29_d11-25877	ACTTCTCCACAGGAGTCAGGTGC	48.73	0.07	49.28	0	0.01	0	0	0	0.02	0.97	0	0	77.332	12568
S026-MC069_SC1-28_d11-25876	ACTTCTCCACAGGAGTCAGGTGC	49.48	0.03	48.72	0	0	0	0	0	0.02	0.92	0	0	85.211	21222
S011-MC069_SC1-38_d11-25886	ACTTCTCCACAGGAGTCAGGTGC	0	0	0	0	0	0	0	0	0.03	1.28	0	0	65.231	3814
S016-MC069_SC1-3_d11-25851	ACTTCTCCACAGGAGTCAGGTGC	0.05	0	0	0	0	0	47.66	0.01	50.59	0.76	0	0.01	90.56	32613
S019-MC069_SC1-39_d11-25887	ACTTCTCCACAGGAGTCAGGTGC	0.18	0	42.64	0	0	0.04	0	0.1	0.18	55.99	0.04	0	60.881	2847
S086-MC069_SC1-83_d11-25931	ACTTCTCCACAGGAGTCAGGTGC	0.1	0.04	46.98	0	0	0	0	0	0.07	51.99	0.01	0	91.505	35776
S148-MC069_SC1-151_d11-25999	ACTTCTCCACAGGAGTCAGGTGC	0.08	0.03	47.28	0.02	0	0	0	0.01	0.06	51.7	0.01	0	95.616	33623
S130-MC069_SC1-125_d11-25973	ACTTCTCCACAGGAGTCAGGTGC	0.08	0.01	47.55	0	0.01	0	0	0	0.03	51.53	0	0	85.638	15611
S139-MC069_SC1-138_d11-25986	ACTTCTCCACAGGAGTCAGGTGC	0.08	0.04	47.29	0	0	0	0	0.01	0.02	51.49	0.28	0	78.393	8300
S010-MC069_SC1-26_d11-25874	ACTTCTCCACAGGAGTCAGGTGC	0.25	0.1	49.95	0	0.05	0.05	0	0	1.83	46.85	0	0	47.791	1968
S191-MC069_SC1-192_d11-26040	ACTTCTCCACAGGAGTCAGGTGC	0.1	47.55	0.04	0.01	0	0	0	0	1.03	50.37	0	0	74.302	10191
S066-MC069_SC1-33_d11-25881	ACTTCTCCACAGGAGTCAGGTGC	0.1	0	0.01	0.01	0	0.01	0	44.69	0.04	54.26	0	0	90.848	28677
S071-MC069_SC1-93_d11-25941	ACTTCTCCACAGGAGTCAGGTGC	0.07	0	0.01	0.01	0	0	0.01	47.92	0.05	51.12	0.01	0	90.95	29761
S047-MC069_SC1-90_d11-25938	ACTTCTCCACAGGAGTCAGGTGC	0.11	0	0	47.29	0	0	0	0.01	0.07	51.68	0.02	0	92.217	42589
S014-MC069_SC1-74_d11-25922	ACTTCTCCACAGGAGTCAGGTGC	0.07	0	0.01	0.01	44.98	0.06	0	0.01	0.07	53.96	0.01	0	96.109	41165
S104-MC069_SC1-98_d11-25946	ACTTCTCCACAGGAGTCAGGTGC	0.15	0	0	0	45.06	0.06	0	0.01	0.1	53.52	0.02	0	80.414	11888
S099-MC069_SC1-133_d11-25981	ACTTCTCCACAGGAGTCAGGTGC	0.05	0	0.02	0	45.05	0.03	0	0	0.02	4.32	49.48	0.03	85.553	16038

## Sheet: SC1 part II
sample_name	target_site_seq	11G	1G_9G_11G	5A_9G_11G	7T_9G_11G	9G	9G_11G	reads	mapping rate
S366-MC069_SC1-195_-26660	ACTTCTCCACAGGAGTCAGGTGC	0.94	0.02	0.01	0.02	0.6	97.18	11224	38.402
S368-MC069_SC1-197_-26662	ACTTCTCCACAGGAGTCAGGTGC	51.18	45.03	0	0	0.16	0.89	20749	51.112

## Sheet: SC3
sample_name	target_site_seq	11G	1G_9G_11G	5A_9G_11G	5T_9G_11G	7A_9G_11G_14G	9G	9G_11G	9G_11G_14G	mapping rate	reads
S452-MC069_SC3-57_-26294	ACTTCTCCACAGGAGTCAGGTGC	0.09	0.02	0	0.01	0	0.05	99.16	0.01	91.974	37615
S387-MC069_SC3-37_-26274	ACTTCTCCACAGGAGTCAGGTGC	0.06	0.01	0.02	0.02	0	0.06	99.13	0.01	91.493	31534
S450-MC069_SC3-33_-26270	ACTTCTCCACAGGAGTCAGGTGC	0.09	0	0.01	0	0	0.09	99.11	0.01	87.383	20856
S453-MC069_SC3-69_-26306	ACTTCTCCACAGGAGTCAGGTGC	0.08	0.01	0.01	0.01	0	0.05	99.1	0.01	93.284	39069
S419-MC069_SC3-41_-26278	ACTTCTCCACAGGAGTCAGGTGC	0.09	0.01	0.01	0	0	0.1	99.1	0.02	89.655	30516
S411-MC069_SC3-40_-26277	ACTTCTCCACAGGAGTCAGGTGC	0.12	0.01	0	0.01	0	0.02	99.1	0.01	79.81	10305
S410-MC069_SC3-28_-26265	ACTTCTCCACAGGAGTCAGGTGC	0.1	0.02	0	0.01	0	0.07	99.06	0.04	84.524	16636
S420-MC069_SC3-53_-26290	ACTTCTCCACAGGAGTCAGGTGC	0.08	0	0.02	0.01	0	0.07	99.05	0.01	93.157	39906
S463-MC069_SC3-94_-26331	ACTTCTCCACAGGAGTCAGGTGC	0.06	0.01	0	0	0	0.1	99.05	0.02	93.439	33961
S426-MC069_SC3-30_-26267	ACTTCTCCACAGGAGTCAGGTGC	0.14	0.01	0	0	0	0.08	99.05	0.02	90.349	30394
S455-MC069_SC3-93_-26330	ACTTCTCCACAGGAGTCAGGTGC	0.1	0.01	0	0.01	0	0.07	99.03	0.01	91.809	39121
S445-MC069_SC3-68_-26305	ACTTCTCCACAGGAGTCAGGTGC	0.12	0.01	0.01	0.01	0	0.08	99.03	0.01	95.208	32635
S440-MC069_SC3-8_-26245	ACTTCTCCACAGGAGTCAGGTGC	0.11	0.01	0	0	0.03	0.05	99.03	0.05	87.594	22647
S418-MC069_SC3-29_-26266	ACTTCTCCACAGGAGTCAGGTGC	0.05	0	0	0.01	0	0.08	99.03	0.01	80.909	10282
S437-MC069_SC3-67_-26304	ACTTCTCCACAGGAGTCAGGTGC	0.07	0.01	0.01	0.01	0	0.06	99.02	0.02	93.612	31880
S429-MC069_SC3-66_-26303	ACTTCTCCACAGGAGTCAGGTGC	0.13	0.01	0.01	0.01	0	0.07	99	0.02	94.997	47053
S385-MC069_SC3-13_-26250	ACTTCTCCACAGGAGTCAGGTGC	0.12	0.02	0.01	0.01	0	0.08	98.98	0.03	91.686	36403
S388-MC069_SC3-49_-26286	ACTTCTCCACAGGAGTCAGGTGC	0.11	0.01	0.01	0	0	0.09	98.97	0.01	94.251	45685
S405-MC069_SC3-63_-26300	ACTTCTCCACAGGAGTCAGGTGC	0.11	0.01	0	0.01	0	0.08	98.97	0.02	82.938	13211
S398-MC069_SC3-74_-26311	ACTTCTCCACAGGAGTCAGGTGC	0.13	0	0	0	0	0.1	98.96	0.02	92.185	28476
S409-MC069_SC3-16_-26253	ACTTCTCCACAGGAGTCAGGTGC	0.19	0	0.04	0	0	0.1	98.96	0.04	76.257	7322
S468-MC069_SC3-59_-26296	ACTTCTCCACAGGAGTCAGGTGC	0.07	0.01	0.01	0	0	0.08	98.95	0.02	89.073	25380
S449-MC069_SC3-21_-26258	ACTTCTCCACAGGAGTCAGGTGC	0.13	0	0	0.02	0	0.06	98.95	0.04	79.36	11134
S451-MC069_SC3-45_-26282	ACTTCTCCACAGGAGTCAGGTGC	0.17	0	0	0.02	0	0.11	98.95	0.02	72.213	5446
S466-MC069_SC3-35_-26272	ACTTCTCCACAGGAGTCAGGTGC	0.1	0.01	0.01	0.01	0.01	0.1	98.91	0.02	87.854	21360
S392-MC069_SC3-2_-26239	ACTTCTCCACAGGAGTCAGGTGC	0.15	0.01	0.01	0.01	0	0.16	98.91	0.01	82.738	17493
S389-MC069_SC3-61_-26298	ACTTCTCCACAGGAGTCAGGTGC	0.2	0	0.03	0.03	0	0.14	98.86	0	65.635	3495
S446-MC069_SC3-80_-26317	ACTTCTCCACAGGAGTCAGGTGC	0.11	0.01	0.01	0	0	0.07	98.85	0.01	89.769	28827
S407-MC069_SC3-87_-26324	ACTTCTCCACAGGAGTCAGGTGC	0.15	0	0.01	0	0	0.13	98.85	0.05	78.484	8525
S427-MC069_SC3-42_-26279	ACTTCTCCACAGGAGTCAGGTGC	0.07	0.05	0.02	0	0	0.07	98.85	0.02	69.869	5581
S473-MC069_SC3-24_-26261	ACTTCTCCACAGGAGTCAGGTGC	0.13	0	0.03	0	0	0.05	98.85	0.1	63.366	3912
S395-MC069_SC3-38_-26275	ACTTCTCCACAGGAGTCAGGTGC	0.08	0	0.02	0.02	0	0.1	98.82	0	75.213	6177
S470-MC069_SC3-83_-26320	ACTTCTCCACAGGAGTCAGGTGC	0.17	0	0	0	0	0.1	98.77	0.03	78.731	8106
S448-MC069_SC3-9_-26246	ACTTCTCCACAGGAGTCAGGTGC	0.14	0.02	0	0.04	0	0.12	98.76	0.02	71.342	4925
S430-MC069_SC3-78_-26315	ACTTCTCCACAGGAGTCAGGTGC	0.24	0.06	0.06	0	0	0.09	98.76	0	62.523	3388
S417-MC069_SC3-17_-26254	ACTTCTCCACAGGAGTCAGGTGC	0.17	0	0.04	0	0	0.04	98.76	0.04	55.696	2421
S459-MC069_SC3-46_-26283	ACTTCTCCACAGGAGTCAGGTGC	0.15	0	0	0	0	0.08	98.76	0.08	46.956	1288
S436-MC069_SC3-55_-26292	ACTTCTCCACAGGAGTCAGGTGC	0.11	0	0	0	0	0.08	98.75	0	80.37	10678
S477-MC069_SC3-72_-26309	ACTTCTCCACAGGAGTCAGGTGC	0.1	0.01	0.01	0	0	0.19	98.73	0.04	86.301	20146
S431-MC069_SC3-90_-26327	ACTTCTCCACAGGAGTCAGGTGC	0.14	0	0.03	0.01	0	0.14	98.69	0.01	71.007	6655
S456-MC069_SC3-10_-26247	ACTTCTCCACAGGAGTCAGGTGC	0.17	0.02	0.03	0.02	0	0.12	98.68	0.02	81.72	12469
S471-MC069_SC3-95_-26332	ACTTCTCCACAGGAGTCAGGTGC	0.14	0	0.05	0	0	0	98.58	0	50.083	2117
S464-MC069_SC3-11_-26248	ACTTCTCCACAGGAGTCAGGTGC	0.16	0.04	0.04	0	0.04	0.2	98.54	0	57.967	2541
S462-MC069_SC3-82_-26319	ACTTCTCCACAGGAGTCAGGTGC	0.23	0	0.04	0	0	0	98.37	0.08	61.119	2641
S400-MC069_SC3-3_-26240	ACTTCTCCACAGGAGTCAGGTGC	0.6	0	0	0	0	0.52	96.63	0	41.778	1337
S402-MC069_SC3-27_-26264	ACTTCTCCACAGGAGTCAGGTGC	2.42	0.02	0.01	0	0	0.14	96.52	0.01	80.647	10803
S439-MC069_SC3-91_-26328	ACTTCTCCACAGGAGTCAGGTGC	0.13	0.01	0.01	0.01	0	0.08	96.42	2.46	88.804	28752
S401-MC069_SC3-15_-26252	ACTTCTCCACAGGAGTCAGGTGC	0.09	0.01	0.01	0.01	0	1.3	96.4	0.01	98.096	61762
S434-MC069_SC3-31_-26268	ACTTCTCCACAGGAGTCAGGTGC	0.07	0	0.01	4.62	0	0.1	94.35	0.01	87.652	25824
S461-MC069_SC3-70_-26307	ACTTCTCCACAGGAGTCAGGTGC	0.08	0.01	0.01	0.01	0	6.08	93.03	0.01	89.295	26397			9G_11G bi allelic		50
S433-MC069_SC3-19_-26256	ACTTCTCCACAGGAGTCAGGTGC	0.04	0	0.01	0	0	42.51	56.56	0.01	97.039	50331			9G, 9G_11G bi allelic		3
S384-MC069_SC3-1_-26238	ACTTCTCCACAGGAGTCAGGTGC	0.12	0	0	0	0	47.63	50.5	0	41.847	1602			9G_11G_14G, 9G_11G bi allelic		2
S399-MC069_SC3-86_-26323	ACTTCTCCACAGGAGTCAGGTGC	0.08	0.01	0.01	0.01	0	48.65	50.23	0.01	84.059	15040			9G_11G, 5T_9G_11G		2
S442-MC069_SC3-32_-26269	ACTTCTCCACAGGAGTCAGGTGC	0.06	0.01	0	0	0.02	0.03	51.5	47.48	95.692	40132					57	0.814286	95	0.742188
S391-MC069_SC3-85_-26322	ACTTCTCCACAGGAGTCAGGTGC	0.07	0.02	0.02	0.02	0.01	0.04	47.38	51.52	73.792	12439
S474-MC069_SC3-36_-26273	ACTTCTCCACAGGAGTCAGGTGC	0.08	0.01	0.01	47.29	0	0.06	51.74	0.01	86.592	19282
S421-MC069_SC3-65_-26302	ACTTCTCCACAGGAGTCAGGTGC	0.13	0	0	51.91	0	0.09	47.02	0.01	84.199	15038
S393-MC069_SC3-14_-26251	ACTTCTCCACAGGAGTCAGGTGC	0.05	0	0.01	0.01	0	0.07	54.73	0.02	86.091	22061			9G_11G mono		10	0.142857	23	0.179688
S394-MC069_SC3-26_-26263	ACTTCTCCACAGGAGTCAGGTGC	45.22	0	0.01	0	0	0.03	53.95	0	81.333	11199
S428-MC069_SC3-54_-26291	ACTTCTCCACAGGAGTCAGGTGC	45.83	0.03	0	0	0	0.2	52.85	0.07	62.4	2952
S438-MC069_SC3-79_-26316	ACTTCTCCACAGGAGTCAGGTGC	0.08	0.01	0	0	0	0.08	51.64	0.02	95.093	44963
S476-MC069_SC3-60_-26297	ACTTCTCCACAGGAGTCAGGTGC	49.16	0	0	0	0	0.08	49.85	0.01	83.682	15489
S414-MC069_SC3-76_-26313	ACTTCTCCACAGGAGTCAGGTGC	0.07	0	0	0	0	0.06	49.26	0.02	88.157	22306
S425-MC069_SC3-18_-26255	ACTTCTCCACAGGAGTCAGGTGC	0.05	0.01	0.01	0.01	0	0.07	49.07	0.01	96.738	46453
S422-MC069_SC3-77_-26314	ACTTCTCCACAGGAGTCAGGTGC	50.12	0	0.01	0	0	0.04	48.99	0.01	94.603	42518
S479-MC069_SC3-96_-26333	ACTTCTCCACAGGAGTCAGGTGC	0.08	0	0	0	0	3.27	47.78	0.01	91.882	39448
S465-MC069_SC3-23_-26260	ACTTCTCCACAGGAGTCAGGTGC	52.23	0.01	0.01	0.01	0	0.09	46.6	0.01	74.275	7733
S432-MC069_SC3-7_-26244	ACTTCTCCACAGGAGTCAGGTGC	0.03	0	0	0	47.56	0.02	1.04	49.76	90.815	33862			9G_11G, 7A_9G_11G		1	0.0142857	1	0.0078125	0.0546875
S444-MC069_SC3-56_-26293	ACTTCTCCACAGGAGTCAGGTGC	99.19	0	0	0	0	0	0.04	0.01	94.383	44896			11G only		1	0.0142857	1	0.0078125
														unedited		0	0	2	0.0078125
S472-MC069_SC3-12_-26249	ACTTCTCCACAGGAGTCAGGTGC	0.11	0	47.9	0.01	0	0.1	50.98	0.01	87.506	31539			9G_11G_5A, 9G_11G		1		1	0.0078125
																70
														Makassar, Makassar+5G		1		1	0.0078125
														Makassar, Makassar+7G		1		1	0.0078125
														Makassar, Makassar+s9P		3		3	0.0234375
																		128

## Sheet: SC3 part 2
sample_name	target_site_seq	11G	1G_9G	1G_9G_11G	5A_9G_11G	5G_9G	7G_9G_11G	7T_9G_11G	9G	9G_11G	9G_11G_14G	reads	mapping rate
S118-MC069_SC3-126_-26363	ACTTCTCCACAGGAGTCAGGTGC	0.75	0	0	0	0	0.01	0	0.53	98.05	0.01	8105	47.756
S134-MC069_SC3-128_-26365	ACTTCTCCACAGGAGTCAGGTGC	0.61	0	0	0.04	0	0	0	0.46	97.91	0.04	2635	28.518
S171-MC069_SC3-192_-26429	ACTTCTCCACAGGAGTCAGGTGC	0.67	0	0.01	0.02	0	0	0	0.46	97.82	0.01	32685	75.07
S157-MC069_SC3-119_-26356	ACTTCTCCACAGGAGTCAGGTGC	0.65	0	0	0.02	0	0	0	0.46	97.79	0	5666	40.034
S143-MC069_SC3-141_-26378	ACTTCTCCACAGGAGTCAGGTGC	0.81	0	0.03	0	0	0	0	0.45	97.76	0	3081	34.158
S152-MC069_SC3-154_-26391	ACTTCTCCACAGGAGTCAGGTGC	0.7	0.01	0.02	0.02	0	0	0.01	0.51	97.75	0.01	9258	53.635
S151-MC069_SC3-142_-26379	ACTTCTCCACAGGAGTCAGGTGC	0.71	0	0	0	0	0	0.04	0.8	97.69	0	2250	27.668
S128-MC069_SC3-151_-26388	ACTTCTCCACAGGAGTCAGGTGC	0.87	0	0	0.01	0	0	0.01	0.44	97.69	0	27617	80.097
S123-MC069_SC3-186_-26423	ACTTCTCCACAGGAGTCAGGTGC	0.78	0	0.01	0	0	0	0.01	0.47	97.62	0	28142	68.986
S117-MC069_SC3-114_-26351	ACTTCTCCACAGGAGTCAGGTGC	0.84	0	0.01	0.03	0	0	0.01	0.5	97.59	0.02	26115	70.325
S125-MC069_SC3-115_-26352	ACTTCTCCACAGGAGTCAGGTGC	0.75	0	0.01	0.03	0	0	0	0.59	97.59	0.01	27417	72.092
S115-MC069_SC3-185_-26422	ACTTCTCCACAGGAGTCAGGTGC	0.8	0	0	0.01	0	0	0.01	0.56	97.53	0.01	34371	73.948
S114-MC069_SC3-173_-26410	ACTTCTCCACAGGAGTCAGGTGC	0.77	0	0	0	0	0	0.02	0.5	97.52	0.04	5205	40.103
S080-MC069_SC3-145_-26382	ACTTCTCCACAGGAGTCAGGTGC	0.84	0	0.01	0.01	0	0	0	0.6	97.52	0	10987	49.324
S109-MC069_SC3-113_-26350	ACTTCTCCACAGGAGTCAGGTGC	0.83	0	0	0.01	0	0	0	0.41	97.52	0.02	18337	62.504
S095-MC069_SC3-135_-26372	ACTTCTCCACAGGAGTCAGGTGC	0.78	0	0	0.01	0	0	0	0.55	97.51	0	29310	78.759
S107-MC069_SC3-184_-26421	ACTTCTCCACAGGAGTCAGGTGC	0.82	0	0	0.03	0	0	0.01	0.45	97.48	0.01	14576	55.993
S135-MC069_SC3-140_-26377	ACTTCTCCACAGGAGTCAGGTGC	0.77	0	0	0	0	0	0	0.58	97.48	0.01	29453	80.083
S078-MC069_SC3-121_-26358	ACTTCTCCACAGGAGTCAGGTGC	0.76	0	0	0.01	0	0	0.01	0.65	97.46	0	7723	44.599
S133-MC069_SC3-116_-26353	ACTTCTCCACAGGAGTCAGGTGC	0.96	0	0.01	0.03	0	0	0.03	0.52	97.46	0.02	10776	50.899
S094-MC069_SC3-123_-26360	ACTTCTCCACAGGAGTCAGGTGC	0.79	0	0	0.01	0	0	0	0.61	97.45	0.03	11674	56.903
S077-MC069_SC3-109_-26346	ACTTCTCCACAGGAGTCAGGTGC	0.84	0	0.03	0.01	0	0	0.01	0.6	97.44	0.03	15749	52.783
S167-MC069_SC3-144_-26381	ACTTCTCCACAGGAGTCAGGTGC	0.84	0	0.03	0	0.03	0	0	0.59	97.35	0.06	3549	33.878
S119-MC069_SC3-138_-26375	ACTTCTCCACAGGAGTCAGGTGC	0.8	0	0	0.01	0	0	0.01	0.68	97.34	0.01	27107	71.417
S093-MC069_SC3-111_-26348	ACTTCTCCACAGGAGTCAGGTGC	0.98	0	0.01	0.02	0	0	0.01	0.58	97.3	0.02	10960	53.134
S079-MC069_SC3-133_-26370	ACTTCTCCACAGGAGTCAGGTGC	0.88	0	0.01	0.02	0	0.01	0.02	0.64	97.28	0.01	17643	62.085
S130-MC069_SC3-175_-26412	ACTTCTCCACAGGAGTCAGGTGC	0.97	0	0.02	0.01	0	0.01	0.01	0.62	97.26	0.01	21019	65.966
S127-MC069_SC3-139_-26376	ACTTCTCCACAGGAGTCAGGTGC	0.97	0	0	0.04	0	0	0	0.59	97.23	0.01	8584	52.753
S132-MC069_SC3-104_-26341	ACTTCTCCACAGGAGTCAGGTGC	0.81	0	0	0.01	0	0.02	0	0.77	97.23	0.02	11714	51.91
S124-MC069_SC3-103_-26340	ACTTCTCCACAGGAGTCAGGTGC	0.94	0	0	0	0	0	0	0.64	97.22	0	2990	27.49
S156-MC069_SC3-107_-26344	ACTTCTCCACAGGAGTCAGGTGC	0.84	0	0.01	0	0	0	0.01	0.77	97.15	0.02	32258	75.196
S154-MC069_SC3-178_-26415	ACTTCTCCACAGGAGTCAGGTGC	1.06	0	0.01	0	0	0.01	0	0.76	96.98	0.01	9075	47.091
S146-MC069_SC3-177_-26414	ACTTCTCCACAGGAGTCAGGTGC	1.09	0	0	0	0	0	0	0.74	96.83	0.05	2020	25.554
S086-MC069_SC3-122_-26359	ACTTCTCCACAGGAGTCAGGTGC	0.82	0	0.01	0.01	0	0	0.02	0.52	93.88	3.53	26865	77.051			Makassar 9G_11G bi		34
S083-MC069_SC3-181_-26418	ACTTCTCCACAGGAGTCAGGTGC	0.46	0	0	0	0	0	0	48.79	48.99	0	3480	25.214			Makassar 9G_11G, Makassar 9G bi		3
S141-MC069_SC3-117_-26354	ACTTCTCCACAGGAGTCAGGTGC	0.72	0	0	0.03	0	0	0	0.49	48.78	48.45	3042	30.077			Makassar 9G_11G, Makassar 9G_11G_14G bi		1
S097-MC069_SC3-159_-26396	ACTTCTCCACAGGAGTCAGGTGC	0.41	0	0.01	0.01	0	0	0	50.58	47.74	0	16792	62.209
S108-MC069_SC3-101_-26338	ACTTCTCCACAGGAGTCAGGTGC	0.43	0	0	0	0	0	0	43.43	54.37	0	3456	29.357					38
S111-MC069_SC3-137_-26374	ACTTCTCCACAGGAGTCAGGTGC	41.14	0	0.01	0.01	0	0	0	0.35	56.79	0.03	6600	41.838
S140-MC069_SC3-105_-26342	ACTTCTCCACAGGAGTCAGGTGC	47.54	0	0.02	0	0	0	0.01	0.65	50.23	0	15657	61.777
S155-MC069_SC3-190_-26427	ACTTCTCCACAGGAGTCAGGTGC	49.59	0	0.04	0	0	0.02	0.02	0.25	49.1	0	5265	40.531
S162-MC069_SC3-179_-26416	ACTTCTCCACAGGAGTCAGGTGC	0.48	0	0	0	0	0	0	0.22	49	0	2306	24.316
S147-MC069_SC3-189_-26426	ACTTCTCCACAGGAGTCAGGTGC	49.5	0	0	0	0	0	0	0.28	48.85	0.01	14229	60.628
S170-MC069_SC3-180_-26417	ACTTCTCCACAGGAGTCAGGTGC	49.67	0	0.01	0.02	0	0.01	0	0.28	48.63	0	27963	72.517
S110-MC069_SC3-125_-26362	ACTTCTCCACAGGAGTCAGGTGC	0.44	0	0.01	0	0	0	0	0.28	48.62	0.01	23551	70.699
S105-MC069_SC3-160_-26397	ACTTCTCCACAGGAGTCAGGTGC	49.86	0	0	0	0	0.01	0.01	0.25	48.61	0.01	26838	70.256
S142-MC069_SC3-129_-26366	ACTTCTCCACAGGAGTCAGGTGC	0.48	0	0.01	0	0	0	0	0.2	48.35	0.01	16694	66.925
S165-MC069_SC3-120_-26357	ACTTCTCCACAGGAGTCAGGTGC	50.22	0	0	0.01	0	0	0	0.2	48.26	0.01	31872	75.609
S081-MC069_SC3-157_-26394	ACTTCTCCACAGGAGTCAGGTGC	50.27	0	0	0	0	0	0	0.26	48.24	0.01	23512	64.068			Makassar mono		13
S099-MC069_SC3-183_-26420	ACTTCTCCACAGGAGTCAGGTGC	50.31	0	0	0.01	0	0	0	0.29	48	0	27296	72.131
S159-MC069_SC3-143_-26380	ACTTCTCCACAGGAGTCAGGTGC	0.01	0	0	0	0	0	0	47.6	0.09	0	9978	56.03
S116-MC069_SC3-102_-26339	ACTTCTCCACAGGAGTCAGGTGC	0.42	0	0	0	46.22	0	0	1.09	47.53	0.01	38655	80.408			Makassar, Makassar+5G		1
S168-MC069_SC3-156_-26393	ACTTCTCCACAGGAGTCAGGTGC	0.45	0	0	0	0.04	46.95	0.04	0.24	50.62	0	2886	30.92			Makassar, Makassar+7G		1
S148-MC069_SC3-106_-26343	ACTTCTCCACAGGAGTCAGGTGC	0.66	0.48	45.62	0.01	0	0	0	0.55	50.42	0.01	45170	83.834			Makassar, Makassar+s9P		3
S103-MC069_SC3-136_-26373	ACTTCTCCACAGGAGTCAGGTGC	0.59	0.45	46.13	0	0	0	0	0.48	50.28	0.02	24965	67.118
S096-MC069_SC3-147_-26384	ACTTCTCCACAGGAGTCAGGTGC	0.64	0.35	46.86	0	0	0	0	0.73	49.61	0	5186	38.403
S120-MC069_SC3-150_-26387	ACTTCTCCACAGGAGTCAGGTGC	0.02	0	0	0	0	0	0	0	0.1	0	6130	38.774			unedited		2
S139-MC069_SC3-188_-26425	ACTTCTCCACAGGAGTCAGGTGC	0.03	0	0	0	0	0	0	0.01	0.01	0	21870	66.383
